# Supplementary material
Source: Springer Nature journal article supplement (https://www.springermedizin.de/resource/supplementary/13221_2011_21_MOESM1_ESM.pdf/9680782)
Supplement: MOESM1 [file 9680782]

**Vascularized growing tumor**

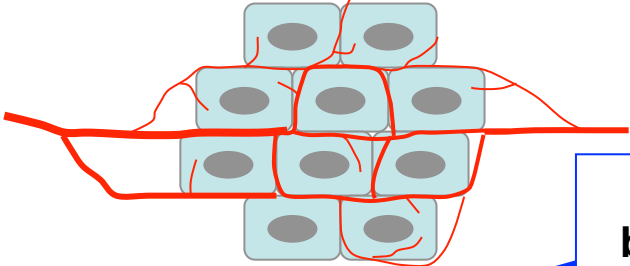

**Dll4  
blockade**

**Increased  
vessel sprouting ?**

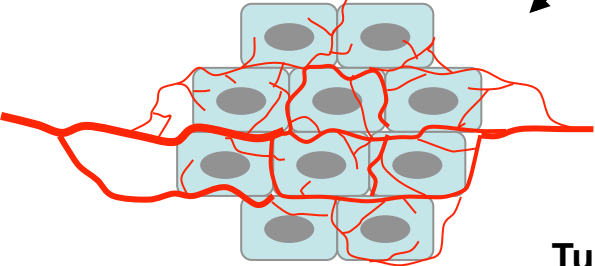

**Decreased  
vascular perfusion ?**

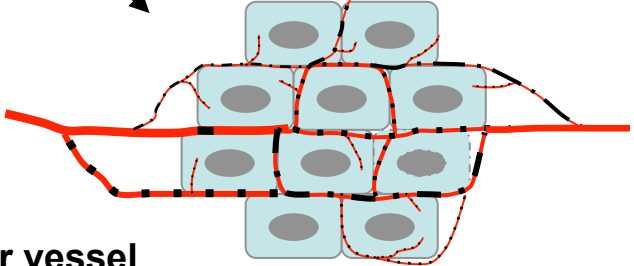

**Tumor vessel  
abnormalization**

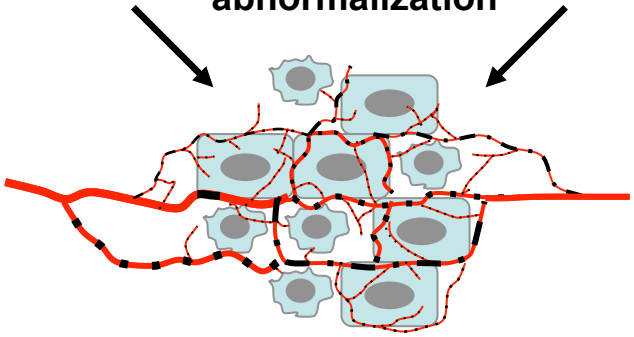

**Poorly perfused tumor**
